# Supplementary material
Source: PubMed Central journal article supplement (PMC2944704)
Supplement: 1010390107_pnas.201010390SI.pdf [file 1010390107_pnas.201010390SI.pdf]

# Supporting Information

Stevenson et al. 10.1073/pnas.1010390107

## SI Materials and Methods

**Hepatocyte Culture and TPO Measurement.** Livers from WT or *Urah<sup>plt2/plt2</sup>* mice aged 5 to 6 wk were perfused retrogradely via the inferior vena cava to isolate individual hepatocytes, as previously described (1). Then,  $6 \times 10^6$  hepatocytes were cultured in RPMI containing 10% vol/vol bovine calf serum (HyClone) and  $5 \times 10^{-5}$  M 2-mercaptoethanol for 60 h at 37 °C in 10% (vol/vol) CO<sub>2</sub> in air before culture supernatant collection and concentration with a centrifugal filter unit (Amicon Ultra-15 10000 MWCO; Millipore). The number of hepatocytes in individual culture flasks was determined by measurement of the total genomic DNA content of each flask using a Quant-iT PicoGreen dsDNA Assay Kit (Invitrogen). TPO content of individual flasks was then corrected for the number of cultured hepatocytes as measured by the total dsDNA content of the cell ly-

sate. TPO concentration in serum, liver lysates, and cell culture supernatant was determined by a Quantikine murine TPO ELISA (R&D Systems).

**Production of *Urah* Transgenic Mice.** Transgenic mice were generated via injection of *C57BL/6* zygotes with a DNA construct in which the *Urah<sup>long</sup>* cDNA was linked to the ubiquitin C promoter (2). DNA extracted from tail tips of founder mice was screened for the presence of the transgene by Southern blot analysis. Colonies were maintained by mating transgene-positive mice with *C57BL/6* partners. Transgenic rescue was performed by mating *Urah* transgenic mice with *Urah<sup>plt2/plt2</sup>* mice and then backcrossing to additional *Urah<sup>plt2/plt2</sup>* mice.

1. Brysha M, et al. (2001) Suppressor of cytokine signaling-1 attenuates the duration of interferon gamma signal transduction in vitro and in vivo. *J Biol Chem* 276: 22086–22089.

2. Schorpp M, et al. (1996) The human ubiquitin C promoter directs high ubiquitous expression of transgenes in mice. *Nucleic Acids Res* 24:1787–1788.

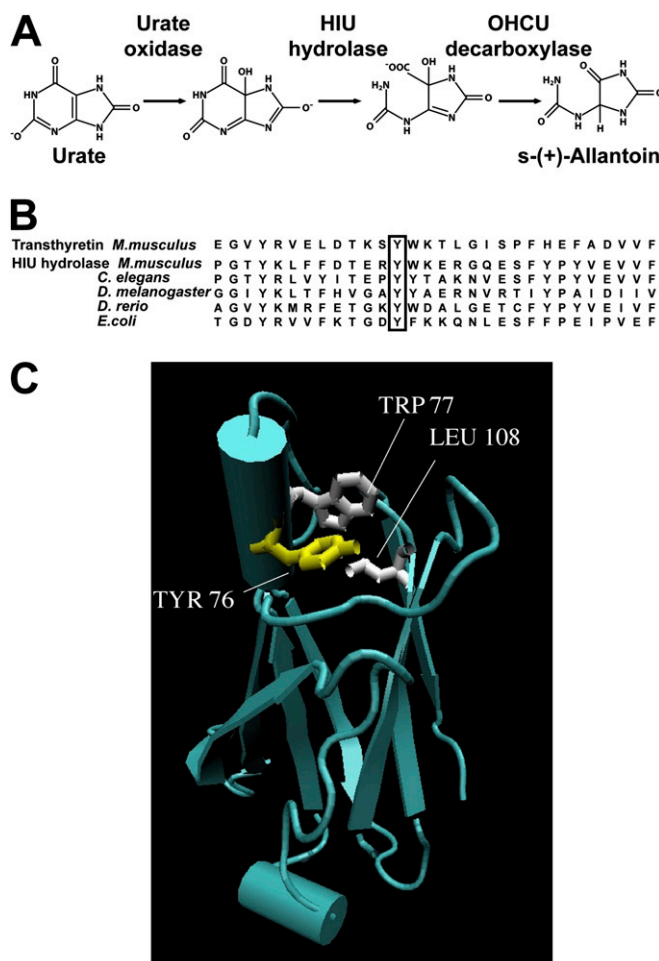

**Fig. S1.** HIU hydrolase structure and function. (A) HIU hydrolase catalyzes the second step of the three-step conversion of urate to allantoin in the mouse and most other nonhuman mammals. (B) Protein homology of HIU hydrolase in the region of the *plt2* mutation with predicted genes from other species (*Mus musculus*, *Caenorhabditis elegans*, *Drosophila melanogaster*, *Danio rerio*, and *Escherichia coli*) demonstrating that the Tyr substituted in *Urah<sup>plt2/plt2</sup>* mice (boxed) has been conserved throughout evolution. (C) Structure of zebrafish HIU hydrolase (1) showing the tyrosine (TYR76 according to numbering as in ref. 1) substituted in *Urah<sup>plt2/plt2</sup>* mice making strong hydrophobic contacts with conserved neighboring residues.

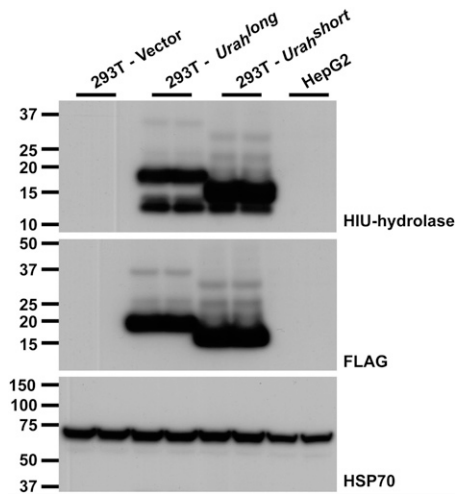

**Fig. S2.** Anti-HIU-hydrolase antiserum detects protein in cells transfected with murine *Urah* cDNA but not in human Hep-G2 cells. 293T cells were transiently transfected with vectors containing the short or long form of the murine *Urah* cDNA, including an N-terminal FLAG epitope tag and lysates examined by Western blot analysis with a rabbit anti-mouse HIU hydrolase polyclonal antiserum, anti-FLAG antibody, or control antibodies to HSP70. Sizes of molecular weight markers are shown in kilodaltons.

**Table S1. Hematological and serum biochemical analysis in *Urah*<sup>plt2/plt2</sup> mice**

|                                      | WT          | <i>Urah</i> <sup>plt2/plt2</sup> |
|--------------------------------------|-------------|----------------------------------|
| <b>Hematology</b>                    |             |                                  |
| Red cell count, 10 <sup>12</sup> /L  | 10.3 ± 0.4  | 10.1 ± 0.4                       |
| White cell count, 10 <sup>9</sup> /L | 9.0 ± 1.7   | 9.1 ± 2.1                        |
| Neutrophils                          | 0.9 ± 0.3   | 0.9 ± 0.8                        |
| Lymphocytes                          | 7.7 ± 1.6   | 7.6 ± 1.3                        |
| Monocytes                            | 0.1 ± 0.1   | 0.1 ± 0.1                        |
| Eosinophils                          | 0.2 ± 0.1   | 0.2 ± 0.1                        |
| Platelets, 10 <sup>9</sup> /L        | 1,424 ± 139 | 2,234 ± 838*                     |
| <b>Serum biochemistry</b>            |             |                                  |
| Total protein, g/L                   | 46 ± 7      | 46 ± 6                           |
| Albumin, g/L                         | 30 ± 2      | 30 ± 2                           |
| Bilirubin, mmol/L                    | 3.1 ± 0.6   | 2.6 ± 0.5                        |
| Alanine aminotransferase, IU/L       | 28 ± 10     | 35 ± 9                           |
| Aspartate aminotransferase, IU/L     | 69 ± 34     | 67 ± 15                          |
| γ-Glutamyl transferase, IU/L         | 0.5 ± 0.8   | 0.3 ± 0.6                        |

*n* = 8–11 mice for biochemical analyses and *n* = 18–24 mice for hematology.

\**P* < 0.01.
